# Supplementary material for: Pressure-induced tuning of physical properties in high-throughput metal halide MSn2Br5 (M = K, Cs) perovskites for optoelectronic applications
Source: Royal Society of Chemistry journal article supplement (doi:10.1039/d3ra06215e), 2024-01-01
Supplement: d3ra06215e1.pdf [file d3ra06215e1.pdf]

## Supporting Information: Pressure-Induced Tuning of Physical Properties in High-throughput Metal Halide $MSn_2Br_5$ ( $M = K, Cs$ ) perovskites for Optoelectronic Applications

Md. Khairul Alam, Md. Nadim Mahamud Nobin, Md. Lokman Ali\*  
Department of Physics, Pabna University of Science and Technology, Pabna-6600, Bangladesh

### Structural properties

Table S1: Computed structural parameters of  $MSn_2Br_5$  ( $M = K, Cs$ ) perovskites.

| Pressure<br>P<br>(GPa) | $CsSn_2Br_5$      |            |                       |                           |                           |                         |            |                       |                           |                           |                          |                          |                          |  |  |
|------------------------|-------------------|------------|-----------------------|---------------------------|---------------------------|-------------------------|------------|-----------------------|---------------------------|---------------------------|--------------------------|--------------------------|--------------------------|--|--|
|                        | Lattice constants |            |                       |                           |                           | Volume Formation energy |            |                       |                           |                           | Br-Sn distance           |                          |                          |  |  |
|                        | $a=b$<br>(Å)      | $c$<br>(Å) | $V$ (Å <sup>3</sup> ) | $\Delta E_f$<br>(eV)/atom | $\Delta E_f$<br>(eV)/atom | $a=b$<br>(Å)            | $c$<br>(Å) | $V$ (Å <sup>3</sup> ) | $\Delta E_f$<br>(eV)/atom | $\Delta E_f$<br>(eV)/atom | Br-Sn<br>distance<br>(Å) | Br-Sn<br>distance<br>(Å) | Br-Sn<br>distance<br>(Å) |  |  |
| 0                      | 8.39              | 14.99      | 527.40                | -2.735                    | -2.735                    | 2.80                    | 8.54       | 16.15                 | 589.06                    | -1.385                    | -1.385                   | 2.79                     | 2.79                     |  |  |
| 5                      | 7.97              | 13.42      | 426.55                | -2.736                    | -2.736                    | 2.85                    | 8.11       | 14.00                 | 460.03                    | -1.393                    | -1.393                   | 2.87                     | 2.87                     |  |  |
| 10                     | 7.75              | 12.90      | 387.38                | -2.738                    | -2.738                    | 2.83                    | 7.90       | 13.31                 | 415.32                    | -1.394                    | -1.394                   | 2.86                     | 2.86                     |  |  |
| 15                     | 7.58              | 12.60      | 362.43                | -2.740                    | -2.740                    | 2.81                    | 7.75       | 12.96                 | 387.81                    | -1.394                    | -1.394                   | 2.83                     | 2.83                     |  |  |
| 20                     | 7.44              | 12.40      | 343.76                | -2.742                    | -2.742                    | 2.79                    | 7.62       | 12.64                 | 367.27                    | -1.399                    | -1.399                   | 2.81                     | 2.81                     |  |  |
| 25                     | 7.33              | 12.24      | 329.08                | -2.744                    | -2.744                    | 2.77                    | 7.52       | 12.43                 | 351.29                    | -1.402                    | -1.402                   | 2.79                     | 2.79                     |  |  |

### Elastic constants

Table S2: The calculated values of elastic constants  $C_{ij}$  (in GPa) for  $KSn_2Br_5$  and  $CsSn_2Br_5$  perovskites at various applied pressures.

| Pressure<br>P (GPa) | $KSn_2Br_5$ |          |          |          |          |          | $CsSn_2Br_5$ |          |          |          |          |          |
|---------------------|-------------|----------|----------|----------|----------|----------|--------------|----------|----------|----------|----------|----------|
|                     | $C_{11}$    | $C_{12}$ | $C_{13}$ | $C_{33}$ | $C_{44}$ | $C_{66}$ | $C_{11}$     | $C_{12}$ | $C_{13}$ | $C_{33}$ | $C_{44}$ | $C_{66}$ |
| 0                   | 24.87       | 10.49    | 5.24     | 15.65    | 7.59     | 13.01    | 12.84        | 4.80     | 6.58     | 8.84     | 5.29     | 11.10    |
| 5                   | 63.19       | 29.40    | 29.42    | 52.67    | 19.75    | 23.95    | 66.86        | 37.94    | 29.42    | 45.66    | 22.58    | 24.23    |
| 10                  | 93.60       | 42.44    | 50.69    | 87.13    | 35.47    | 31.99    | 96.09        | 55.46    | 47.49    | 77.09    | 30.89    | 31.44    |
| 15                  | 128.51      | 63.50    | 71.99    | 113.18   | 45.07    | 41.29    | 125.03       | 68.84    | 63.05    | 111.58   | 39.27    | 39.52    |
| 20                  | 153.59      | 72.84    | 88.04    | 140.25   | 57.58    | 48.63    | 153.49       | 85.59    | 80.67    | 139.85   | 51.18    | 44.73    |
| 25                  | 182.07      | 86.45    | 104.83   | 166.58   | 72.55    | 56.50    | 176.38       | 98.22    | 91.36    | 167.69   | 58.40    | 51.28    |

## Mechanical Properties

Table S3: The calculated bulk modulus  $B$  (GPa), shear modulus  $G$  (GPa), Young's modulus  $E$  (GPa), Pugh's ratio  $B/G$  and Poisson's ratio  $\nu$  of  $KSn_2Br_5$  perovskite.

| Pressure<br>P (GPa) | Bulk modulus |        |        | Shear modulus |       |       | Young's<br>modulus<br>E | Pugh's<br>ratio<br>B/G | Poisson's<br>ratio<br>$\nu$ |
|---------------------|--------------|--------|--------|---------------|-------|-------|-------------------------|------------------------|-----------------------------|
|                     | $B_V$        | $B_R$  | $B$    | $G_V$         | $G_R$ | $G$   |                         |                        |                             |
| 0                   | 11.93        | 10.91  | 11.42  | 8.60          | 8.03  | 8.32  | 20.07                   | 1.37                   | 0.21                        |
| 5                   | 39.51        | 39.19  | 39.35  | 18.75         | 18.02 | 18.38 | 47.71                   | 2.14                   | 0.29                        |
| 10                  | 62.45        | 62.44  | 62.44  | 29.29         | 27.39 | 28.34 | 73.85                   | 2.20                   | 0.30                        |
| 15                  | 87.24        | 87.16  | 87.20  | 37.14         | 34.39 | 35.76 | 94.38                   | 2.44                   | 0.32                        |
| 20                  | 105.03       | 105.03 | 105.03 | 45.99         | 42.08 | 44.04 | 115.91                  | 2.38                   | 0.32                        |
| 25                  | 124.77       | 124.76 | 124.77 | 55.96         | 50.46 | 53.21 | 139.76                  | 2.34                   | 0.31                        |

Table S4: The calculated bulk modulus  $B$  (GPa), shear modulus  $G$  (GPa), Young's modulus  $E$  (GPa), Pugh's ratio  $B/G$  and Poisson's ratio  $\nu$  of  $CsSn_2Br_5$  perovskite.

| Pressure<br>P (GPa) | Bulk modulus |        |        | Shear modulus |       |       | Young's<br>modulus<br>E | Pugh's<br>ratio<br>B/G | Poisson's<br>ratio<br>$\nu$ |
|---------------------|--------------|--------|--------|---------------|-------|-------|-------------------------|------------------------|-----------------------------|
|                     | $B_V$        | $B_R$  | $B$    | $G_V$         | $G_R$ | $G$   |                         |                        |                             |
| 0                   | 7.83         | 7.70   | 7.77   | 5.44          | 3.59  | 4.52  | 11.35                   | 1.72                   | 0.26                        |
| 5                   | 41.44        | 38.94  | 40.19  | 19.38         | 17.83 | 18.61 | 48.36                   | 2.16                   | 0.29                        |
| 10                  | 63.35        | 61.96  | 62.65  | 26.57         | 25.16 | 25.86 | 68.20                   | 2.42                   | 0.32                        |
| 15                  | 83.50        | 83.00  | 83.25  | 34.73         | 33.69 | 34.21 | 90.26                   | 2.43                   | 0.32                        |
| 20                  | 104.52       | 104.13 | 104.32 | 42.75         | 41.12 | 41.93 | 110.93                  | 2.49                   | 0.32                        |
| 25                  | 120.26       | 120.04 | 120.15 | 49.58         | 48.12 | 48.85 | 129.06                  | 2.46                   | 0.32                        |

Table S5: Influence of pressure on the hardness of  $M\text{Sn}_2\text{Br}_5$  ( $M = K, Cs$ ) perovskites.

| P<br>(GPa) | Perovskites                | H <sub>1</sub> | H <sub>2</sub> | H <sub>3</sub> | H <sub>4</sub> | H <sub>5</sub> | H <sub>6</sub> | H <sub>7</sub> | H <sub>8</sub> |
|------------|----------------------------|----------------|----------------|----------------|----------------|----------------|----------------|----------------|----------------|
| 0          | $K\text{Sn}_2\text{Br}_5$  | 1.10           | 1.22           | 1.23           | 1.27           | -1.43          | 0.91           | 1.60           | 7.01           |
|            | $Cs\text{Sn}_2\text{Br}_5$ | 0.75           | 0.69           | 0.67           | 0.72           | -2.10          | 0.49           | 0.72           | 6.11           |
| 5          | $K\text{Sn}_2\text{Br}_5$  | 3.79           | 2.90           | 2.71           | 3.03           | 0.35           | 2.14           | 2.59           | 23.76          |
|            | $Cs\text{Sn}_2\text{Br}_5$ | 3.87           | 2.94           | 2.74           | 3.07           | 0.39           | 2.18           | 2.62           | 24.23          |
| 10         | $K\text{Sn}_2\text{Br}_5$  | 6.01           | 4.48           | 4.18           | 4.69           | 2.11           | 3.20           | 3.79           | 32.65          |
|            | $Cs\text{Sn}_2\text{Br}_5$ | 6.03           | 4.14           | 3.81           | 4.33           | 1.68           | 2.85           | 3.10           | 34.76          |
| 15         | $K\text{Sn}_2\text{Br}_5$  | 8.40           | 5.73           | 5.27           | 5.99           | 3.43           | 3.96           | 4.29           | 42.99          |
|            | $Cs\text{Sn}_2\text{Br}_5$ | 8.02           | 5.48           | 5.05           | 5.73           | 3.15           | 3.78           | 4.10           | 41.71          |
| 20         | $K\text{Sn}_2\text{Br}_5$  | 10.11          | 7.04           | 6.50           | 7.36           | 4.89           | 4.77           | 5.27           | 47.62          |
|            | $Cs\text{Sn}_2\text{Br}_5$ | 10.05          | 6.73           | 6.18           | 7.04           | 4.52           | 4.74           | 5.04           | 48.68          |
| 25         | $K\text{Sn}_2\text{Br}_5$  | 12.02          | 8.48           | 7.85           | 8.87           | 6.51           | 6.03           | 6.76           | 52.43          |
|            | $Cs\text{Sn}_2\text{Br}_5$ | 11.57          | 7.83           | 7.21           | 8.20           | 5.74           | 5.46           | 5.87           | 52.76          |
